# Supplementary material
Source: PubMed Central journal article supplement (PMC4729986)
Supplement: ijcem0008-22246-f5.pdf [file ijcem0008-22246-f5.pdf]

# The prognostic role of *BRAF* V600E Mutation in PTC patients

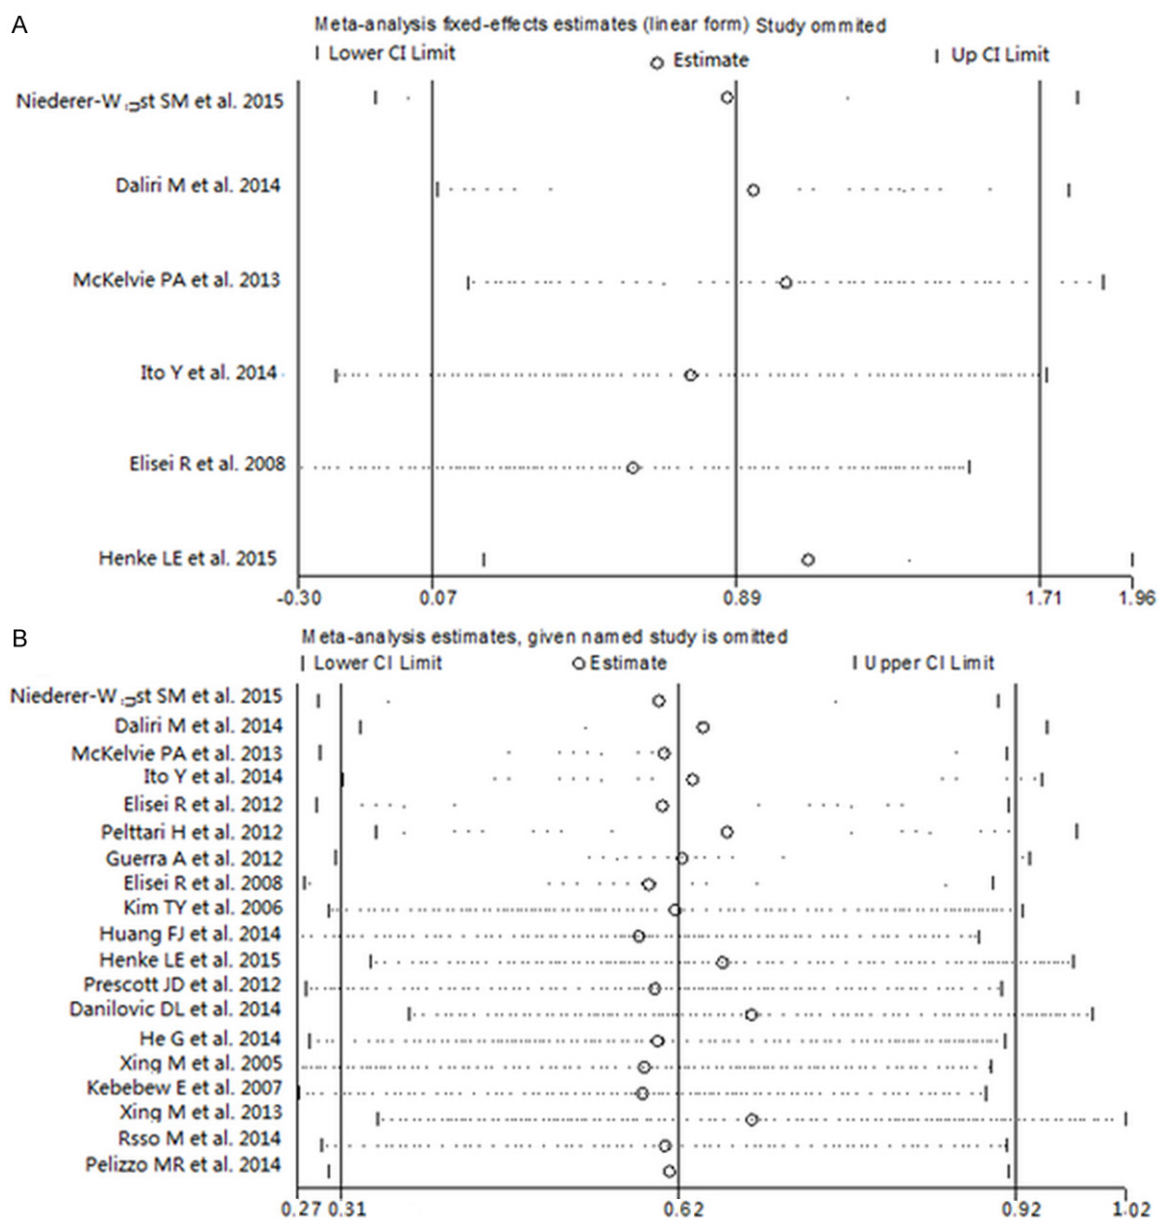

Supplementary Figure 1. Sensitivity analysis of OS (A) and RFS (B).
